# Supplementary material for: Opportunistic pathogens and large microbial diversity detected in source-to-distribution drinking water of three remote communities in Northern Australia
Source: PLOS journal article supplement (doi:10.1371/journal.pntd.0007672), 2019-09-05
Supplement: S7 (10.1371/journal.pntd.0007672.s007) [file journal.pntd.0007672.s007]

**S4 Figure:**

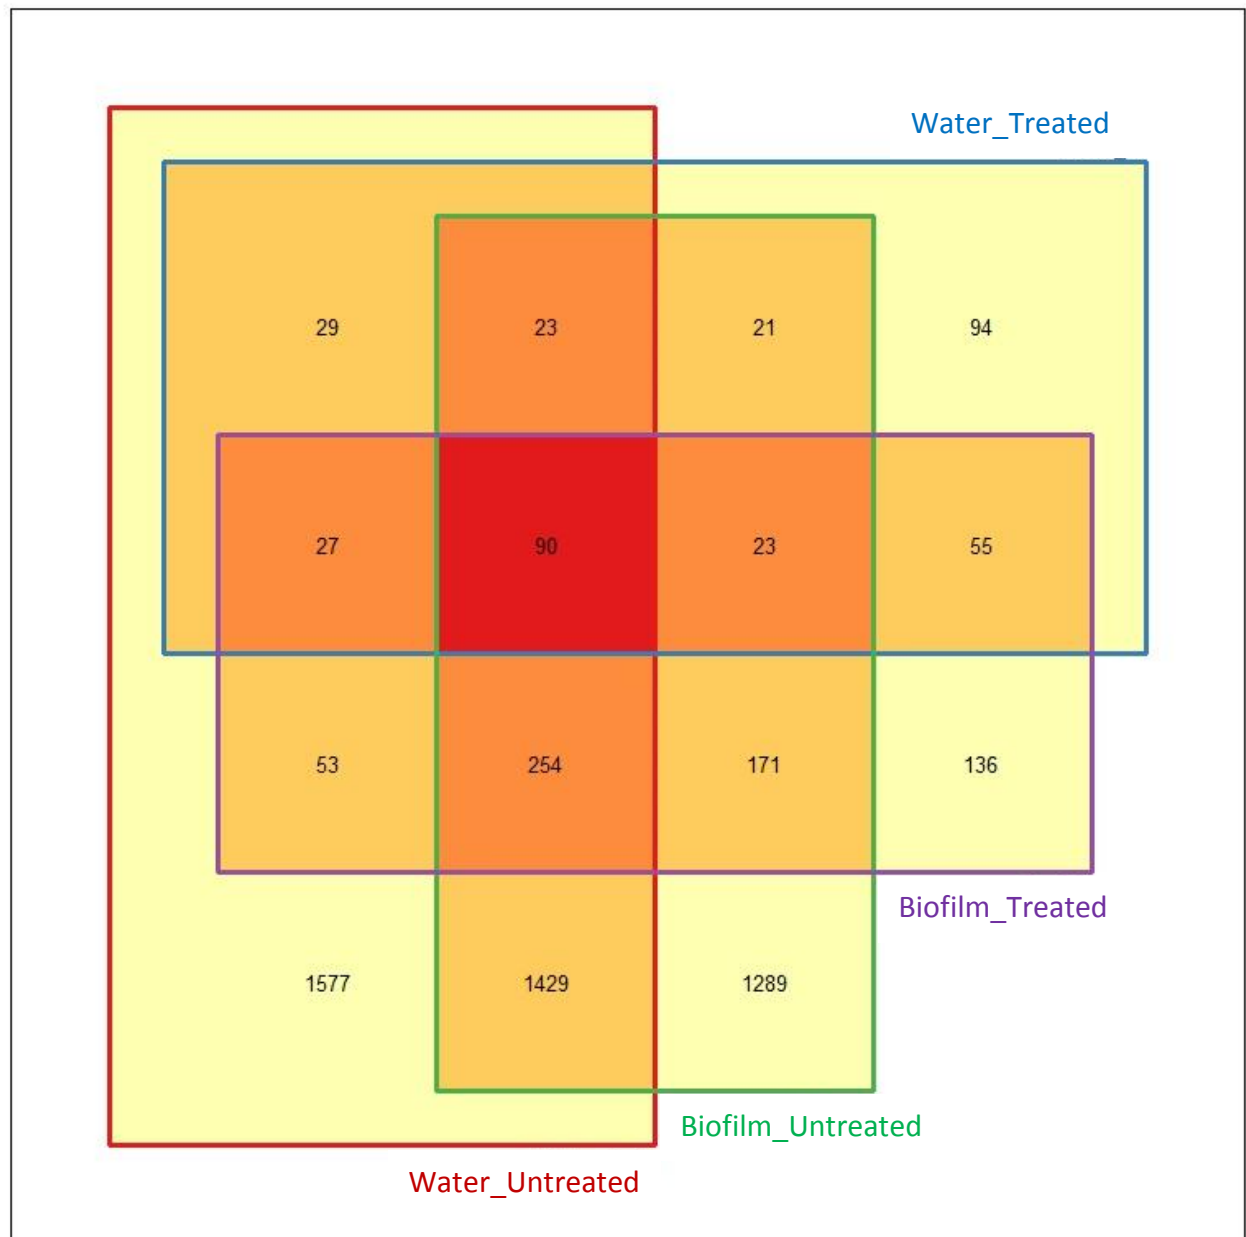

**S4 Figure Legend:** Venn diagram showing the number of SVs shared between water and biofilm, untreated and treated samples. The R package Vennerable was used to produce the Venn diagram. Only SVs which occurred in a minimum of two samples were considered.
